# Supplementary material for: Comparative evaluation of plasma biomarkers of Schistosoma haematobium infection in endemic populations from Burkina Faso
Source: bioRxiv or medRxiv preprint supplement (doi:10.1101/2024.04.12.24304946), 2024-04-15
Supplement: Supplementary file [file media-1.pdf]

1 **SUPPLEMENTARY INFORMATION**

2 **Supplementary Figure 1. Venn proportional diagram showing the comparison of CAA**  
3 **and cfDNA testing results (DeepVenn, <https://arxiv.org/abs/2210.04597>).**

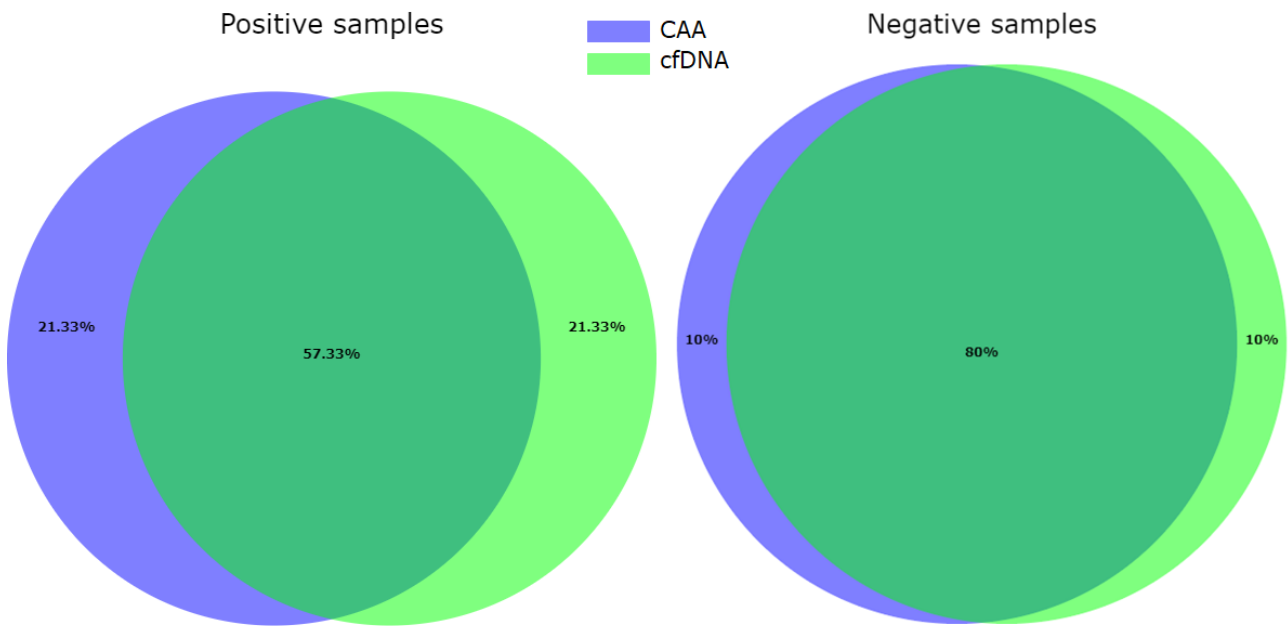

4

5

6 **Supplementary Figure 2. ROC curves illustrating the diagnostic performance of anti-**  
7 ***S.haematobium* antibodies compared to Circulating Anodic Antigen.**

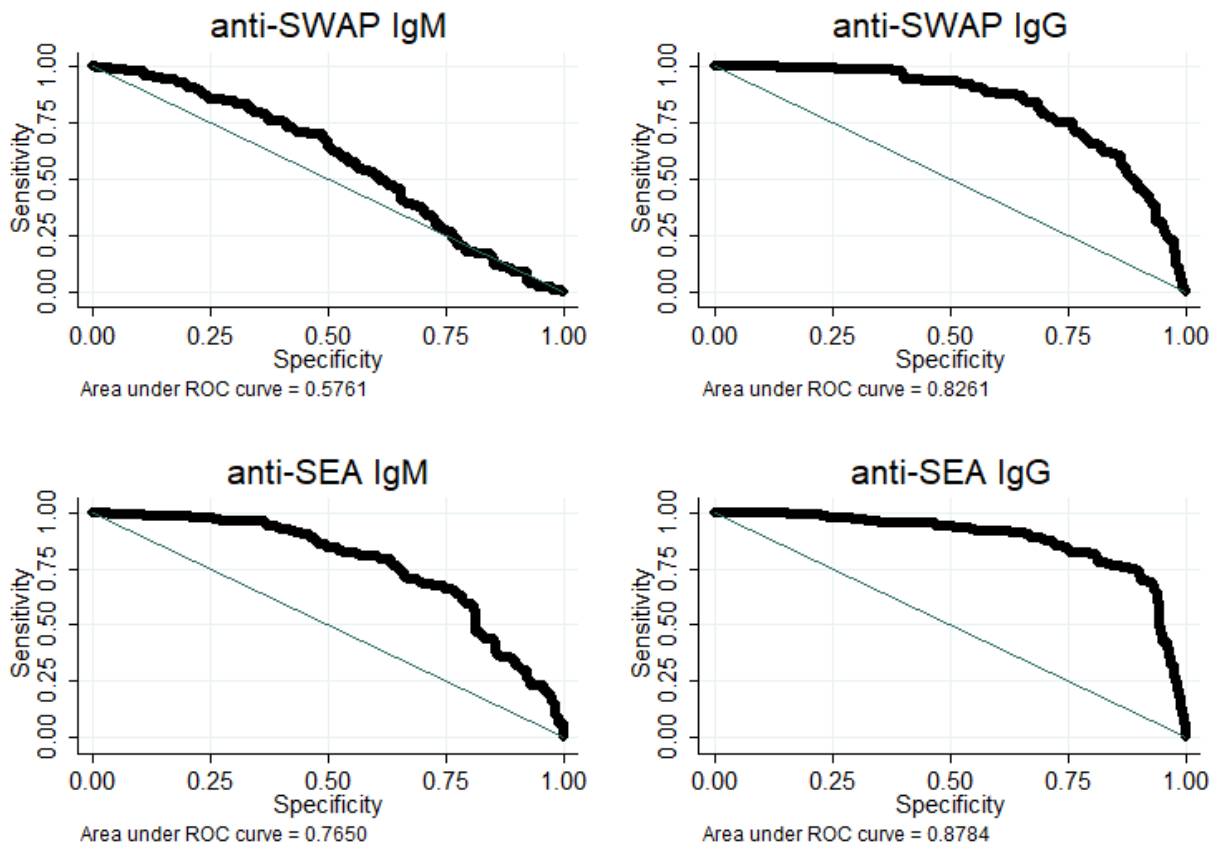

8

9

10

11 **Supplementary Figure 3. ROC curves illustrating the diagnostic performance of anti-**  
12 ***S.haematobium* antibodies compared to Composite Reference Standard.**

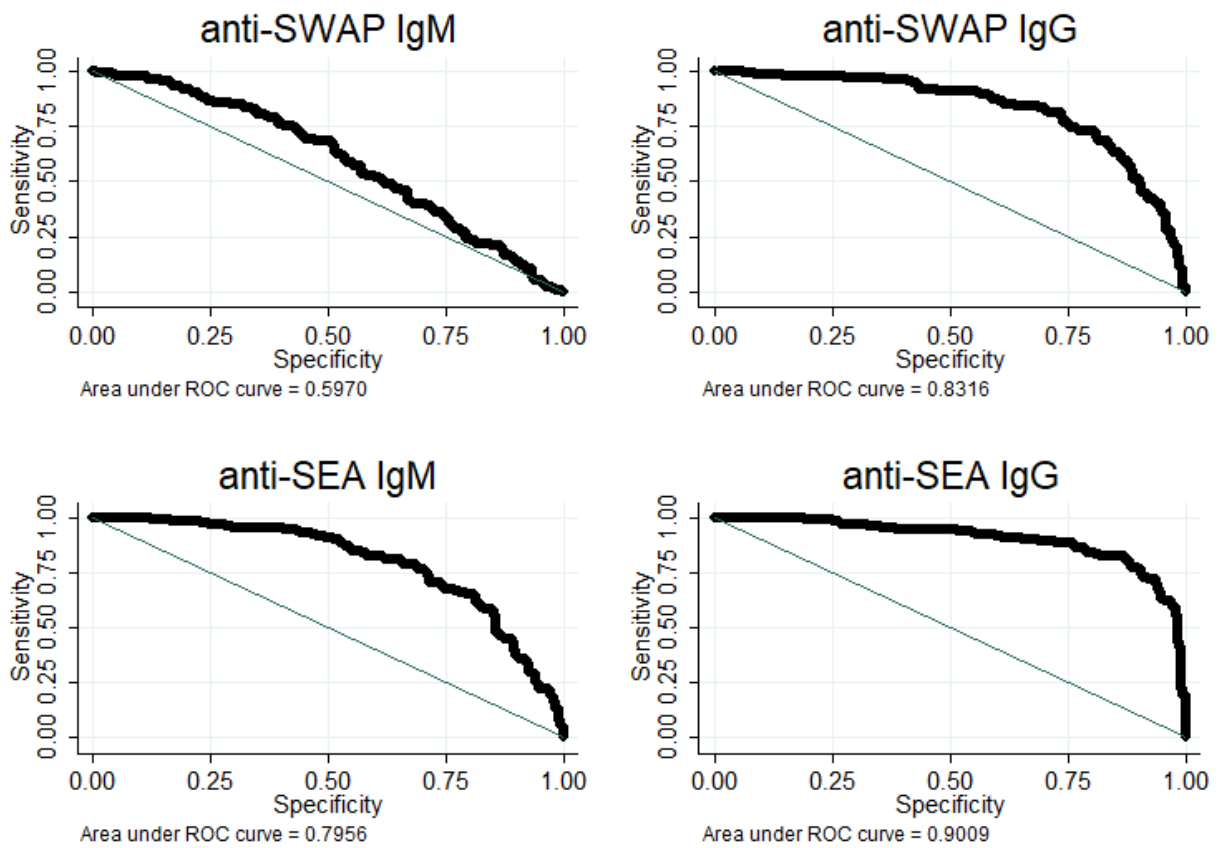

13

14

15

16

17 **Supplementary Figure 4. ROC curves illustrating the diagnostic performance of anti-**  
18 ***S.haematobium* antibodies compared to Latent Class Analysis.**

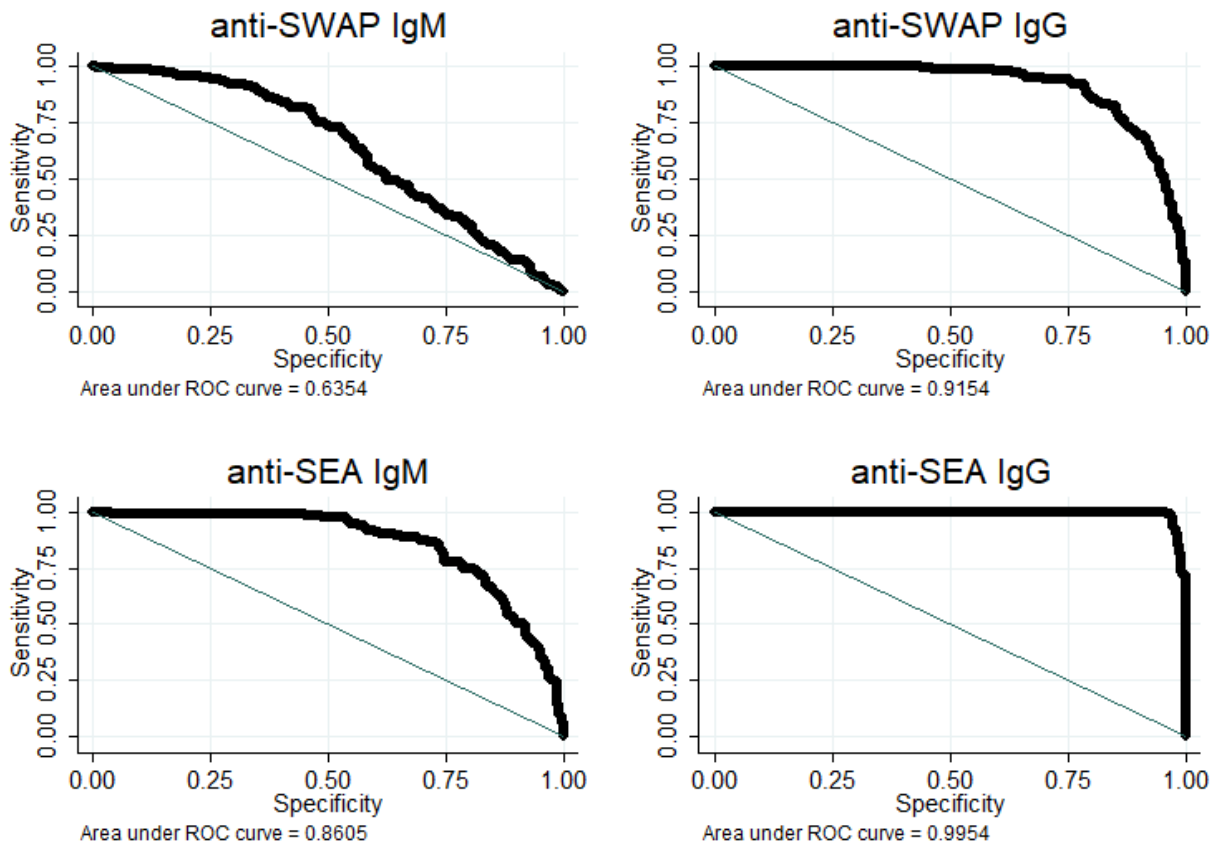

19

20

21

22

23

24

25
